# Supplementary material
Source: PubMed Central journal article supplement (PMC6222203)
Supplement: zjb999094911s1.pdf [file zjb999094911s1.pdf]

Supplemental Materials: Tables and Figures.

**Table S1. RNA-seq statistics.**

| Strain bioreplicate & treatment | Total number of reads sequenced | Total number of reads mapped uniquely | Reads not mapped to chromosome | Reads mapped >1x to chromosome |
|---------------------------------|---------------------------------|---------------------------------------|--------------------------------|--------------------------------|
| WT 1                            | 15,846,152                      | 13,074,337                            | 2,364,088                      | 407,727                        |
| WT 2                            | 15,735,848                      | 13,004,425                            | 2,333,234                      | 398,189                        |
| WT 3                            | 35,684,241                      | 32,020,819                            | 2,823,043                      | 840,379                        |
| WT 1 +MMC                       | 15,727,305                      | 13,067,209                            | 2,089,081                      | 571,015                        |
| WT 2 +MMC                       | 15,727,305                      | 13,067,209                            | 2,089,081                      | 571,015                        |
| WT 3 +MMC                       | 33,294,158                      | 29,923,271                            | 2,417,759                      | 953,128                        |
| $\Delta rtcR$ 1                 | 46,571,576                      | 39,022,270                            | 4,440,113                      | 3,109,193                      |
| $\Delta rtcR$ 2                 | 16,427,543                      | 14,633,741                            | 1,384,032                      | 409,770                        |
| $\Delta rtcR$ 3*                | 3,775,980                       | 1,527,319                             | 2,175,792                      | 72,869                         |
| $\Delta rtcR$ 1 +MMC            | 39,833,788                      | 35,711,397                            | 2,830,132                      | 1,292,259                      |
| $\Delta rtcR$ 2 +MMC            | 21,193,827                      | 18,855,747                            | 1,688,471                      | 649,609                        |
| $\Delta rtcR$ 3 +MMC            | 16,059,581                      | 14,226,416                            | 1,353,148                      | 480,017                        |
| $\Delta rsr$ 1                  | 22,386,184                      | 19,119,591                            | 2,709,208                      | 557,385                        |
| $\Delta rsr$ 2                  | 15,510,441                      | 12,646,470                            | 2,466,666                      | 397,305                        |
| $\Delta rsr$ 3                  | 16,137,416                      | 8,062,563                             | 7,812,809                      | 262,044                        |
| $\Delta rsr$ 1 +MMC             | 16,845,332                      | 14,966,926                            | 1,380,774                      | 497,632                        |
| $\Delta rsr$ 2 +MMC             | 34,518,155                      | 30,850,209                            | 2,522,913                      | 1,145,033                      |
| $\Delta rsr$ 3 +MMC             | 14,983,343                      | 13,383,635                            | 1,146,785                      | 452,923                        |
| $\Delta rtcB$ 1                 | 19,899,438                      | 18,018,089                            | 1,411,306                      | 470,043                        |
| $\Delta rtcB$ 2                 | 21,493,828                      | 19,585,216                            | 1,448,051                      | 460,561                        |
| $\Delta rtcB$ 3                 | 19,875,919                      | 17,728,551                            | 1,661,371                      | 485,997                        |
| $\Delta rtcB$ 1 +MMC            | 23,946,132                      | 21,203,786                            | 1,797,872                      | 944,474                        |
| $\Delta rtcB$ 2 +MMC            | 16,631,197                      | 14,857,557                            | 1,293,566                      | 480,074                        |
| $\Delta rtcB$ 3 +MMC            | 18,257,370                      | 15,983,836                            | 1,728,604                      | 544,930                        |

\*Biological replicate  $\Delta rtcR$  3 gave insufficient reads for good coverage of the transcriptome, and so the data was not used in subsequent analyses of the RNA-seq data for  $\Delta rtcR$  (see Materials and Methods).

**Table S2. Correlation of FPKM data from RNA-seq with *S. Typhimurium* strain and condition biological replicates.**

| <b>Strain &amp; treatment</b>             |                           |
|-------------------------------------------|---------------------------|
| <b>Bioreplicates compared</b>             | <b>Pearson's <i>r</i></b> |
| <b>WT</b>                                 |                           |
| 1 vs 2                                    | 0.98                      |
| 2 vs 3                                    | 0.96                      |
| 1 vs 3                                    | 0.97                      |
| <b>WT+MMC</b>                             |                           |
| 1 vs 2                                    | 0.90                      |
| 2 vs 3                                    | 0.95                      |
| 1 vs 3                                    | 0.88                      |
| <b><math>\Delta</math><i>rtcR</i></b>     |                           |
| 1 vs 2                                    | 0.97                      |
| <b><math>\Delta</math><i>rtcR</i>+MMC</b> |                           |
| 1 vs 2                                    | 0.88                      |
| 2 vs 3                                    | 0.98                      |
| 1 vs 3                                    | 0.91                      |
| <b><math>\Delta</math><i>rsr</i></b>      |                           |
| 1 vs 2                                    | 0.97                      |
| 2 vs 3                                    | 0.97                      |
| 1 vs 3                                    | 0.99                      |
| <b><math>\Delta</math><i>rsr</i>+MMC</b>  |                           |
| 1 vs 2                                    | 0.84                      |
| 2 vs 3                                    | 0.85                      |
| 1 vs 3                                    | 0.98                      |
| <b><math>\Delta</math><i>rtcB</i></b>     |                           |
| 1 vs 2                                    | 0.94                      |
| 2 vs 3                                    | 1.0                       |
| 1 vs 3                                    | 0.96                      |
| <b><math>\Delta</math><i>rtcB</i>+MMC</b> |                           |
| 1 vs 2                                    | 1.0                       |
| 2 vs 3                                    | 0.98                      |
| 1 vs 3                                    | 0.98                      |

**Table S3. Bacterial strains and plasmids used in this study.**

| Strain/Plasmid          | Description or Construction                                                                                                                                                                                                                                                         | Source or reference               |
|-------------------------|-------------------------------------------------------------------------------------------------------------------------------------------------------------------------------------------------------------------------------------------------------------------------------------|-----------------------------------|
| <b>S. Typhimurium</b>   |                                                                                                                                                                                                                                                                                     |                                   |
| ATCC 14028s             | Wild-type                                                                                                                                                                                                                                                                           | ATCC                              |
| DJS101                  | 14028s $\Delta rtcR$                                                                                                                                                                                                                                                                | This study                        |
| ANE004                  | 14028s $\Delta rsr$                                                                                                                                                                                                                                                                 | This study                        |
| DJS102                  | 14028s $\Delta rtcB$                                                                                                                                                                                                                                                                | This study                        |
| CH06                    | 14028s $\Delta(dinJ-yafQ)$                                                                                                                                                                                                                                                          | This study                        |
| CH01                    | 14028s $\Delta ntrC$                                                                                                                                                                                                                                                                | This study                        |
| ACB01                   | 14028s $\Delta rpoN$                                                                                                                                                                                                                                                                | Ref. (1)                          |
| JE10649                 | LT2 <i>metE205 ara-9 <math>\Delta recA::kan</math></i>                                                                                                                                                                                                                              | Courtesy of J. Escalante-Semerena |
| DS103                   | 14028s $\Delta recA::kan$                                                                                                                                                                                                                                                           | This study                        |
| JEK17                   | 14028s $\Delta rsr::xylE$                                                                                                                                                                                                                                                           | This study                        |
| JEK21                   | DJS101 $\Delta rsr::xylE-kan$                                                                                                                                                                                                                                                       | This study                        |
| SGD_recA_Kan            | 14020s $\Delta recA::kan$                                                                                                                                                                                                                                                           | BEI Resources, ATCC               |
| JEK26                   | JEK17 $\Delta recA::kan$                                                                                                                                                                                                                                                            | This study                        |
| JEK41                   | JEK17 $\Delta rtcR::kan$                                                                                                                                                                                                                                                            | This study                        |
| MS1868                  | LT2 <i>leuA414 hsdL Fels2</i>                                                                                                                                                                                                                                                       | Ref.(2)                           |
| <b>E. coli</b>          |                                                                                                                                                                                                                                                                                     |                                   |
| MG1655 ( <i>rph-1</i> ) | <i>rph-1</i>                                                                                                                                                                                                                                                                        | Courtesy of S. Kushner            |
| JW3385                  | BW25113 $\Delta rtcR$                                                                                                                                                                                                                                                               | Ref. (3)                          |
| ACK206                  | MG1655 <i>rph-1 <math>\Delta rtcR</math></i>                                                                                                                                                                                                                                        | This study                        |
| DH5 $\alpha$            | F <sup>-</sup> <i>endA1 glnV44 thi-1 recA1 relA1 gyrA96 deoR nupG purB20 <math>\phi</math>80dlacZ<math>\Delta</math>M15 <math>\Delta(lacZYA-argF)</math>U169, hsdR17(<i>r<math>\kappa</math><sup>-</sup>m<math>\kappa</math><sup>+</sup></i>), <math>\lambda</math><sup>-</sup></i> | Courtesy of C. Moran              |
| <b>Plasmids</b>         |                                                                                                                                                                                                                                                                                     |                                   |
| pKD4                    | <i>kan</i> template with FLP recognition target sites for $\lambda$ -Red recombination, Kan <sup>R</sup>                                                                                                                                                                            | Ref. (4)                          |
| pKD46                   | Expresses $\lambda$ -Red genes $\gamma$ , $\beta$ , and <i>exo</i> from arabinose-inducible P <sub>araB</sub> promoter, Amp <sup>R</sup>                                                                                                                                            | Ref. (4)                          |
| pCP20                   | Temperature-sensitive origin, thermal induced FLP recombinase expression vector, Amp <sup>R</sup>                                                                                                                                                                                   | Ref. (5)                          |
| pSB306                  | pBlueScript derivative with <i>xylE</i> gene from <i>Pseudomonas putida</i> , Amp <sup>R</sup>                                                                                                                                                                                      | Ref. (6)                          |
| pCR2.1                  | TA cloning vector, Amp <sup>R</sup> Kan <sup>R</sup>                                                                                                                                                                                                                                | Invitrogen; Carlsbad, CA          |
| pCR4                    | TA cloning vector, Amp <sup>R</sup> Kan <sup>R</sup>                                                                                                                                                                                                                                | Invitrogen; Carlsbad, CA          |

|         |                                                                                                                                                                                                       |            |
|---------|-------------------------------------------------------------------------------------------------------------------------------------------------------------------------------------------------------|------------|
| pKH66   | pSC101 derivative with P <sub>taq</sub> -Hin, Str <sup>R</sup><br>Spc <sup>R</sup>                                                                                                                    | Ref. (7)   |
| pSRK-Tc | Derivative of pBBR1, expression vector<br>containing a reengineered <i>lac</i> <sup>q</sup> - <i>lac</i><br>promoter-operator complex for tight<br>repression in absence of inducer, Tet <sup>R</sup> | Ref. (8)   |
| pBAD30  | Derivative of pACYC-184, expression<br>vector with arabinose-inducible P <sub>BAD</sub><br>promoter, Amp <sup>R</sup>                                                                                 | Ref. (9)   |
| pDS171  | pCR2.1 with 197 bp 14028s <i>rpoD</i><br>fragment                                                                                                                                                     | This study |
| pDS185  | pCR4 with 180 bp 14028s <i>rtcA</i> fragment                                                                                                                                                          | This study |
| pDS181  | pCR4 with truncated 14028s <i>rtcR</i> (to<br>produce RtcR <sub>con</sub> )                                                                                                                           | This study |
| pDS183  | pKH66 digested with BamHI-HindIII,<br>with BamHI-HindIII <i>rtcR</i> <sub>con</sub> fragment<br>from pDS181                                                                                           | This study |
| pCH11   | pCR2.1 with full-length 14028s <i>rtcR</i>                                                                                                                                                            | This study |
| pCH12   | pSRK-Tc with NdeI-XhoI <i>rtcR</i> fragment<br>from pCH11                                                                                                                                             | This study |
| pJK3    | pSRK-Tc with NdeI-XhoI <i>rtcR</i> fragment,<br>amplified from MG1655 genomic DNA                                                                                                                     | This study |
| pJK20   | pBAD30 with EcoRI-HindIII <i>yafQ</i><br>fragment, amplified from 14028s<br>genomic DNA                                                                                                               | This study |

**Table S4. Oligonucleotides used in this study.**

| Number                             | Name            | Sequence                                                         |
|------------------------------------|-----------------|------------------------------------------------------------------|
| <b>Deletion strain generation:</b> |                 |                                                                  |
| 1                                  | rtcR-RED F      | GCCTTTGGTTTTGTCCGGTACGGTACTCGACTATGCATATGTAG<br>GCTGGAGCTGCTTCG  |
| 2                                  | rtcR-RED R      | ATTCTGTAAAACGTCCCACGTCAGCCCAAACGCGCCATATGA<br>ATATCCTCCTTAG      |
| 3                                  | rsr-RED F       | CATGGAGAATAACGGAAATGGGAAAAACAATGTGTAGGCTGGA<br>GCTGCTTC          |
| 4                                  | rsr-RED R       | GGCCAGCATTGCGCGCCGCGCTGAATACTCTCATATGAATATCC<br>TCCTTA           |
| 5                                  | rtcB-RED F      | CAGAACGCACCGGTAAAAATGTGGACCAAAGGCGTATGTGTAG<br>GCTGGAGCTGCTTCG   |
| 6                                  | rtcB-RED R      | TCCTTTAACGCACACCACCTGCCGCAGGGCGTACATCATATGA<br>ATATCCTCCTTAG     |
| 7                                  | dinJ-yafQ red F | ATTTGAACTGTATAGAGACACAGTACAGGAGACTAATCGTGTGT<br>AGGCTGGAGCTGCTTC |
| 8                                  | dinJ-yafQ red R | CCTGAAAGCACCGGTAAACATATGGGCAAAAACGGCGCTTCAT<br>ATGAATATCCTCCTTA  |

|                                      |                |                                                                       |
|--------------------------------------|----------------|-----------------------------------------------------------------------|
| 9                                    | NtrC::KanF     | CGAGTTTTCGGTTTACCTGCCGATTCGGAAATAGAGGTGTTGT<br>GTAGGCTGGAGCTGCTTC     |
| 10                                   | NtrC::KanR     | CGCGGGTAATGTTTACTCCATTCCCAGCTCTTTCAACTTCCATA<br>TGAATATCCTCCTTA       |
| 11                                   | rsr42-xylE-F   | CAATAACCATGGCATGGAGAATAACGGAAATGGGAAAAACAAA<br>TGAACAAAGGTGTAATGCGACC |
| 12                                   | KanR-xylE-R    | AAGCAGCTCCAGCCTACACATCAGGTCAGCACGGTCATG                               |
| 13                                   | xylE-KanR-F    | TGCTGACCTGATGTGTAGGCTGGAGCTGCTTC                                      |
| 14                                   | rsr42-KanR-R   | AGATGTAATCCCGGCCAGCATTGCGGCCGCGCTGAATACTCTC<br>ATATGAATATCCTCCTTA     |
| <b>Deletion strain verification:</b> |                |                                                                       |
| 15 (11)                              | ckrtcR-F       | CCATTTCCGTTATTCTCCATGCC                                               |
| 16 (12)                              | ckrtcR-R       | GTGATGCAGGTGTTGACGG                                                   |
| 17 (13)                              | ckSTM3521-F    | GCAGATCGATACACACCAGGC                                                 |
| 18 (14)                              | ckSTM3521-R    | TTAATGACTACCGTGCAGGC                                                  |
| 19 (15)                              | ckrtcB-O       | ATCTGCCCCGCCGCCCTCTCC                                                 |
| 20 (16)                              | ckrtcB-R       | TCTACATTTGTTGCGGGTTCGAGACCC                                           |
| 21 (17)                              | ck dinJ-yafQ F | GTTTGTATGTGTGTCTCAGTTGAGC                                             |
| 22 (18)                              | ck dinJ-yafQ R | CTGAAAGCACCGGTTAACATATGG                                              |
| 23 (19)                              | ck recA F      | CGGTTCAATACCAAGTTGCATGAC                                              |
| 24 (20)                              | ck recA R      | GAATGGCGGCTTCGTTTTGC                                                  |
| 25 (21)                              | ntrC-Fwd1      | CGAGTTTTCGGTTTACCTGCCGATTCGGAAATAGAGGTGTTGT<br>GTAGGCTGGAGCTGCTTC     |
| 26 (22)                              | ntrC-Rev       | CGCGGGTAATGTTTACTCCATTCCCAGCTCTTTCAACTTCCATA<br>TGAATATCCTCCTTA       |
| 27                                   | RTCR-192       | AGGTGCTGACGGACCACCAT                                                  |
| 28                                   | RTCR-1886      | CGTCCGTAACCGGAGATTTCC                                                 |
| <b>qRT-PCR:</b>                      |                |                                                                       |
| 29                                   | rpoD-RT F      | AACGAATAAGTGTGGATACCG                                                 |
| 30                                   | rpoD-RT R      | TCTTCCATTACCTGAATACCC                                                 |

|                 |               |                                                      |
|-----------------|---------------|------------------------------------------------------|
| 31              | rtcA-RT F     | CTGGTTAGCTACCGCTTCCG                                 |
| 32              | rtcA-RT F     | CGAACGTGAAGTCGCAACGC                                 |
| 33              | rtcA F1       | GCTGGGCTCGCAACAGTTGC                                 |
| 34              | rtcA R1       | GGACGGTTTGCAGCACCAGC                                 |
| 35              | rtcB Q2 F     | GTGATGAGCCGAACGAAAGC                                 |
| 36              | rtcB Q2 R     | CCGCATCAATATCTTTATACGCC                              |
| 37              | kdgR RT F     | CGGATGTACTCACGTATTGGGCG                              |
| 38              | kdgR RT R     | CAGTGCTGGTAATCGTGCGTCC                               |
| 39              | glnK RT F     | CGTTCAAGCTGGAGGACGTGC                                |
| 40              | glnK RT R     | GCGATACAGTTCGGCGTGTCC                                |
| 41              | gltU,V,W F    | GTCCCCTTCGTCTAGAGGCC                                 |
| 42              | gltU,V,W R1   | TGGCGTCCCCTAGGGGATTC                                 |
| 43              | EcRpoD-RT F   | GCTGAAACTTCTTGTCACCC                                 |
| 44              | EcRpoD-RT R   | CATCAGATCATCGGCATCCG                                 |
| 45              | EcRtcA-RT F   | CGTGAAATCGCTACACTGGC                                 |
| 46              | EcRtcA-RT R   | CCTCTTTCACCAACTGTGCC                                 |
| 47              | E.coli_mdh-F  | TGACCAAACGCATCCAGAAC                                 |
| 48              | E.coli_mdh-R  | GCACGAACCAGAGACAGACC                                 |
| 49              | StMdh-RT-F    | GCCGAGCTGACTAAACGTATTC                               |
| 50              | StMdh-RT-R    | GAACCAGAGAAAGACCGAAACG                               |
| <b>Cloning:</b> |               |                                                      |
| 51              | rtcRcon-F2    | ATTATTGGATCCTAAAGAGGTATATATTAATGCTCAACTTCCTG<br>AAGT |
| 52              | rtcR-R        | AAGCTTAATTCTGTAAAACGTCCC                             |
| 53              | NdeI-RtcR F   | ACGCATATGCGAAAAACGGTGGCCTTTGG                        |
| 54              | XhoI-RtcR R   | AAGCTCGAGTTAATTCTGTAAAACGTCCCACGTCAGCC               |
| 55              | NdeI-EcRtcR-F | ATCACTCATATGCGTAAAACAGTGGCTTTTGG                     |
| 56              | XhoI-EcRtcR-R | ATCACTCTCGAGTCAACTGGAGCTGTGCTGATC                    |
| 57              | yafQ-EcoRI-F  | ATCACTGAATTCATGGGGCAAAGGGAAATTG                      |

|                                                            |                |                                     |
|------------------------------------------------------------|----------------|-------------------------------------|
| 58                                                         | yafQ-HindIII-R | ATCACTAAGCTTTTAAAATAAATCGGCATGCGTTC |
| <b>Sequencing:</b>                                         |                |                                     |
| 59                                                         | pSRK Insert F  | CCGGCTCGTATGTTGTGTGG                |
| 60                                                         | pSRKTc Rev     | CAAGGCGATTAAGTTGGGTAACG             |
| 61                                                         | M13F(-21)      | TGTAAAACGACGGCCAGT                  |
| 62                                                         | M13R           | CAGGAAACAGCTATGAC                   |
| 63                                                         | pBAD Forward   | ATGCCATAGCATTTCATCC                 |
| 64                                                         | pBAD Reverse   | GATTTAATCTGTATCAGG                  |
| <b>Northerns and <i>dinJ-yafQ</i> transcript analyses:</b> |                |                                     |
| 65                                                         | T-A transc R   | ATCCGCTATATGAACCTTGTAACG            |
| 66                                                         | T-A transc F1  | TCGGCGTAAAAGGCACCAGC                |
| 67                                                         | T-A transc F2  | AGCGACTAAGTCATCTTTACGAGC            |
| 68                                                         | T-A transc F3  | GCTTGTTTCGTGCCCGTATCG               |
| 69                                                         | valV           | TGTCAAGGTGGTGTCTAACCAAC             |
| 70                                                         | ARGX-89        | TCCGGAGGGCAGCGCTCTAT                |
| 71                                                         | GLTmature      | ACCCCTGTTACCGCCGTGAA                |
| 72                                                         | rho1 RT R      | TCAACTCATGTCTGTTTCGCTGTC            |
| 73                                                         | LPP-1          | TCAGCTGGTCAACTTTAGCG                |
| 74                                                         | rsr Q1 R       | GCACAAAGTTACGCAGCATCC               |
| 75                                                         | rtcB Q1 R      | GGTGGCACGAATTTGATCG                 |
| 76                                                         | rtcA probe     | TCCACCACCGCAATATTGGTA               |
| 77                                                         | DINJ6350       | CACGCGCAACTTTAGTCAGT                |
| 78                                                         | YRLB-3594      | TAGCCGGGATGATACGCATC                |
| 79                                                         | Pseudo-tRNA R  | CTGACGGGTCTCGAACCC                  |
| <b>Additional qRT-PCR Primers:</b>                         |                |                                     |
| 80                                                         | rsr-RT1-F      | TTGGTAAGCCGTGCGATAAG                |
| 81                                                         | rsr-RT1-R      | AAACGACACATCGGGTAAGG                |



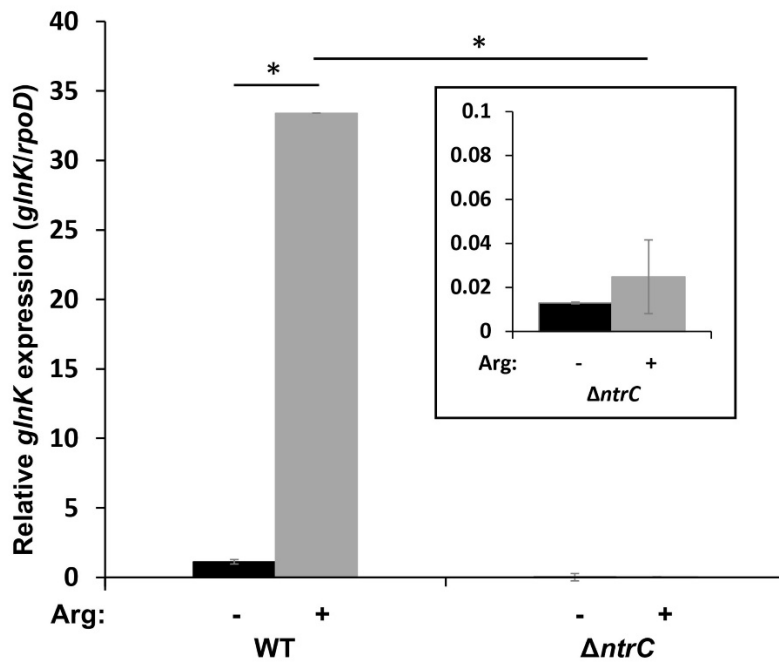

**FIG S1.** Nitrogen-limiting conditions activate NtrC to stimulate expression of *glnK*. NtrC activation by the nitrogen-limiting conditions (90-min growth in minimal medium containing arginine as the sole nitrogen source) was assayed using qRT-PCR to measure *glnK* transcript levels (normalized to *rpoD* levels) in WT and the  $\Delta ntrC$  mutant. Significant differences in relative *glnK* expression between treated and untreated samples and between the treated WT and  $\Delta ntrC$  strains are indicated ( $*P < 0.0001$ ). Data shown are for 3 biological replicates for each strain; error bars represent  $\pm 1$  standard deviation.

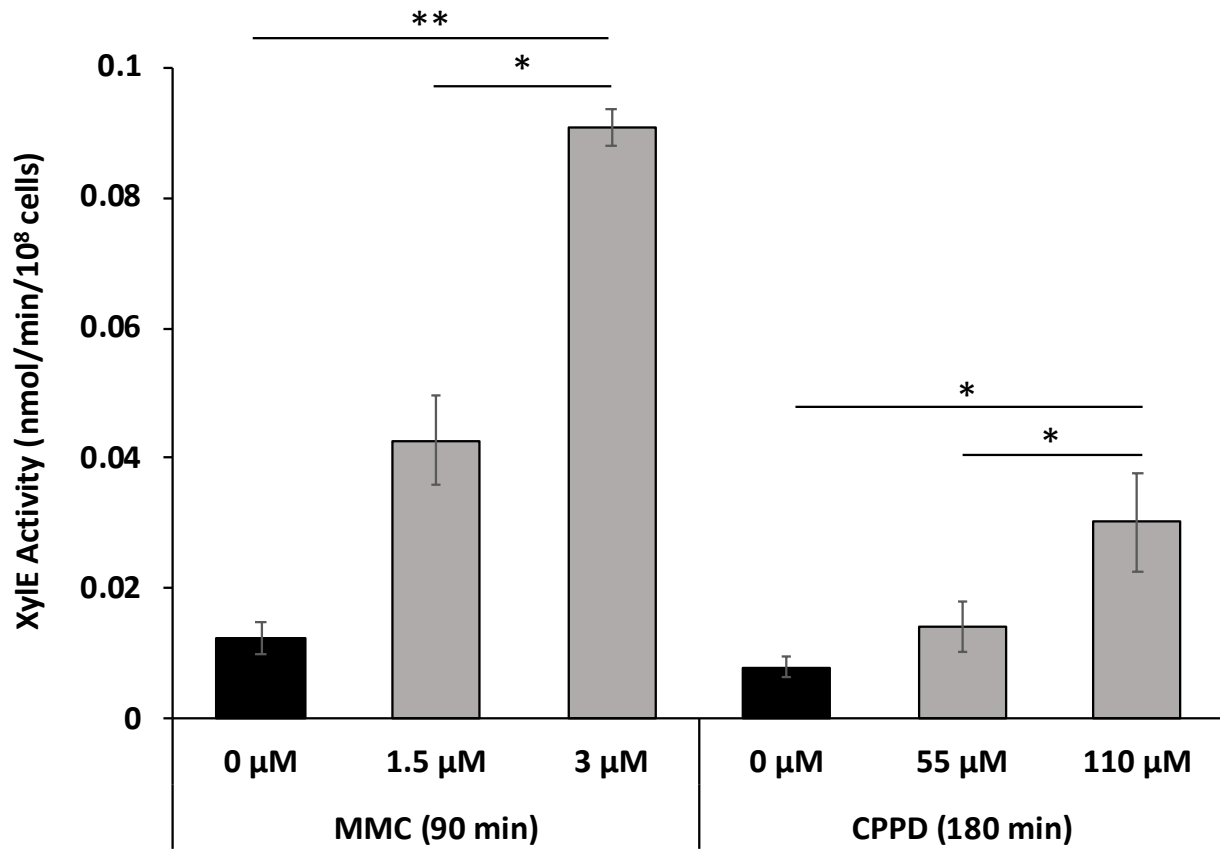

**FIG S2.** Induction of the RNA repair operon is proportionate to the level of nucleotide damage incurred. Biological replicates of the reporter strain JEK17 (WT  $\Delta rsr::xylE$ ) were grown to mid-log phase and split into three cultures: one remained untreated, one received an intermediate dose of MMC or CPPD, and one received a high dose of MMC or CPPD (concentrations specified on the x-axis). Cells were treated for 90 min (MMC) or 180 min (CPPD) and promoter activity at  $P_{rsr}$  was inferred by assaying cells for XylE activity. Data are given as nmol of catechol oxidized per minute (normalized to  $10^8$  cells). Each bar represents the average of three biological replicates; error bars represent  $\pm 1$  standard deviation. Significant differences are indicated (\*  $P < 0.05$ , \*\*  $P < 0.001$ ).

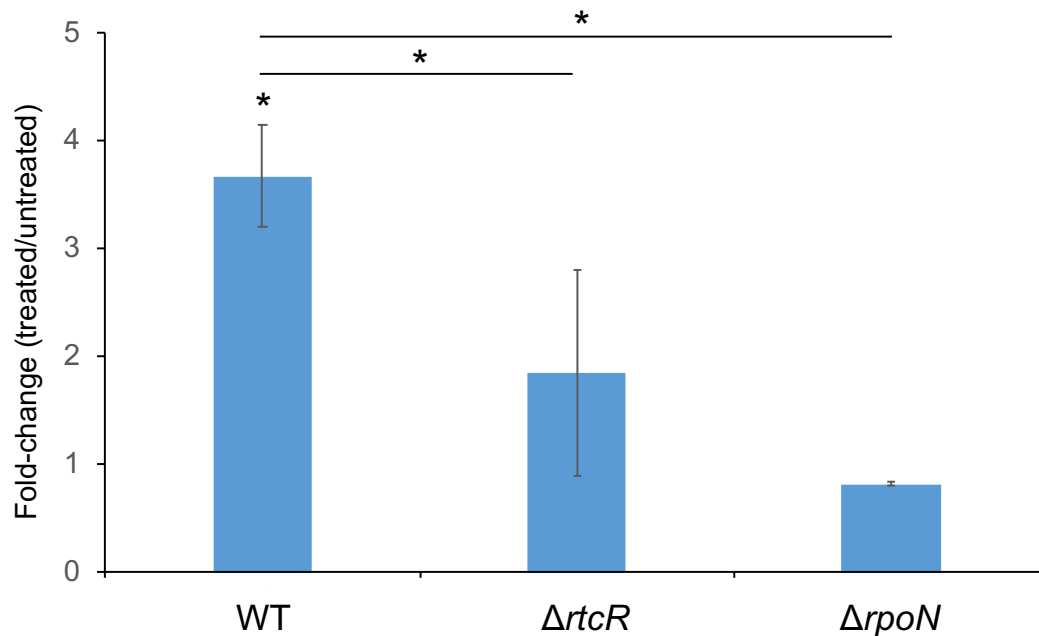

**FIG S3.** Analysis of *rsr* expression during low- level peroxide stress. 14028s WT,  $\Delta rtcR$ , or  $\Delta rpoN$  strains were grown to mid-log phase in LB and split into two cultures. One culture was treated with 1 mM  $H_2O_2$  for 20 min, while the other remained untreated. Expression of *rsr* was assessed by qRT-PCR; transcript levels were normalized to expression of the reference gene *kdgR*. The data denote the fold-increase in expression of  $H_2O_2$ -treated cells vs. untreated cells. Statistically significant differences between treated and untreated cells and between different strains are indicated (\*  $P < 0.05$ ); error bars represent  $\pm 1$  standard deviation.

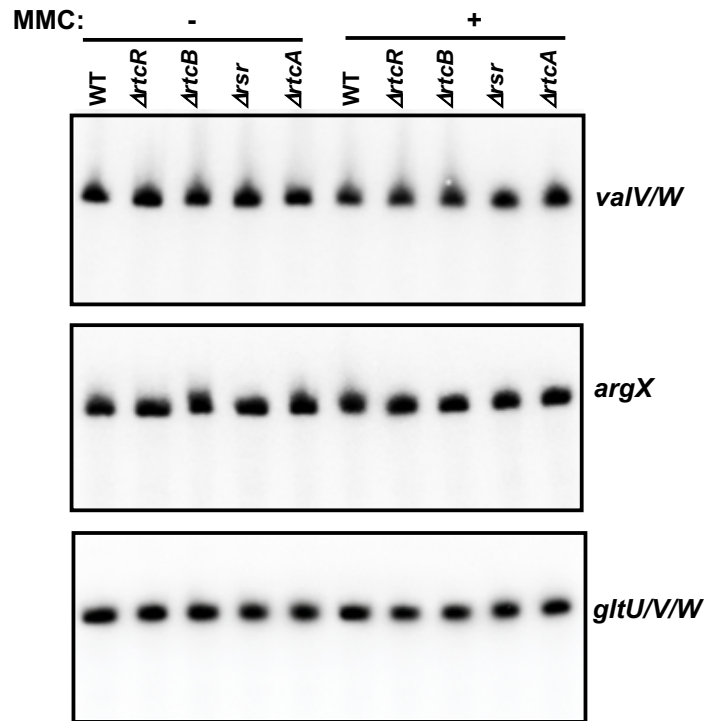

**FIG S4.** Northern blot analysis of transcripts for *valV*, *argX*, and *gltU/V/W*. The Northern blots were prepared with equal amounts of total steady state RNA from *S. Typhimurium* 14028s WT,  $\Delta rtcR$ ,  $\Delta rtcB$ ,  $\Delta rsr$ , and  $\Delta rtcA$  strains (untreated and treated with MMC) electrophoresed on a 8% polyacrylamide gel. Each membrane was probed for *valV/W*, *argX*, or *gltU/V/W*. These Northern blots are representative of results from 2 to 3 biological replicates.

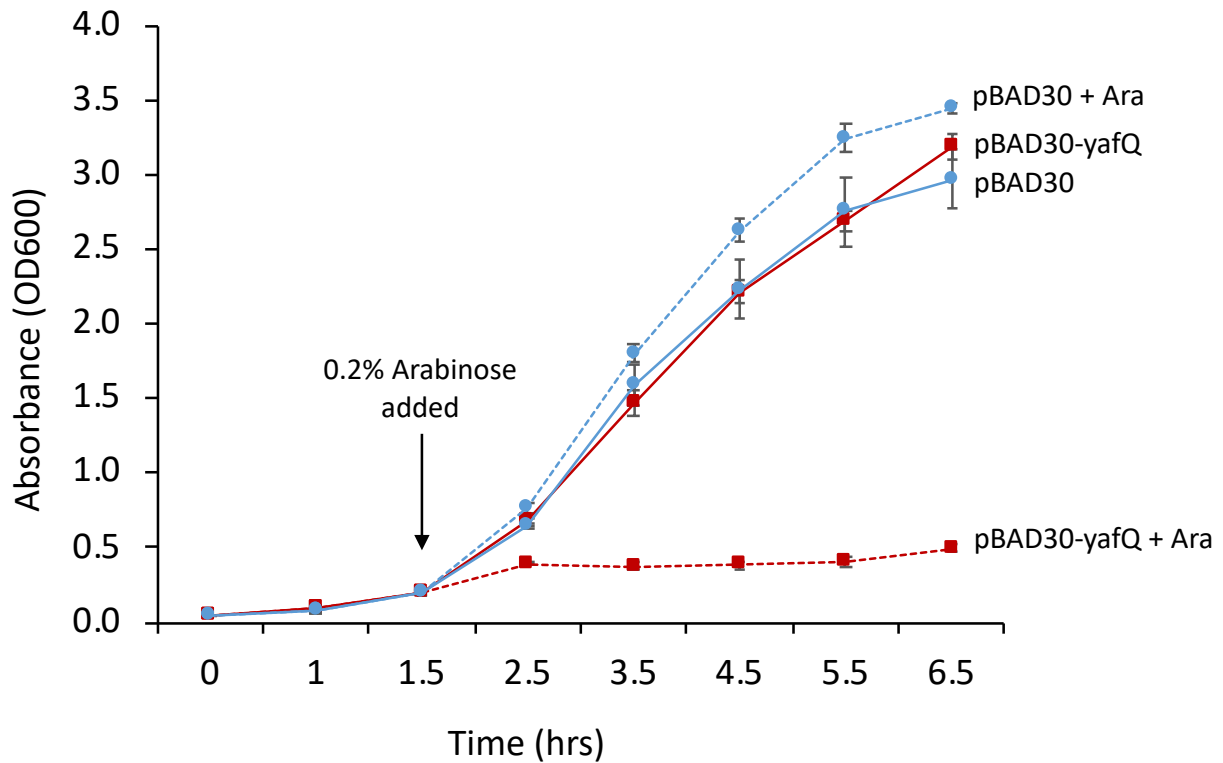

**FIG S5.** The RNA-cleaving toxin YafQ represses growth in *S. Typhimurium*. Growth curve assays were performed to verify the activity of YafQ *in vivo*. WT cultures containing pJK20 (pBAD30-yafQ) or pBAD30 empty vector were split and either induced with 0.2% arabinose (Ara) or remained untreated. OD<sub>600</sub> readings were taken every hour for up to 5 hours after induction. The data shown are the average of 3 biological replicates for each strain; error bars represent  $\pm 1$  standard deviation.

```

14028s      1 MRKTVAFGFVGTVLDYAGRGSORWEKWRPTLCLCQQETLVVHRLELLYDARSRSLFEGLK
MG1655      1 MRKTVAFGFVGTVLDYAGRGSORWSKWRPTLCLCQQESLVIDRLELLHDARSRSLFETLK
          ***** ** ***** ** ***** ** ***** **

14028s      61 KDIASVSPETEVVGVEIAIRNPWFEEVYACLHDFARSHTFHPEDEDYLIHITTGTHVAQ
MG1655      61 RDIASVSPETEVVSVEIELHNPWFEEVYACLHDFARGYEFOPEKEDYLIHITTGTHVAQ
          ***** ** ***** * ** *****

14028s      121 ICWFLLAEARYLPARLAQTSPPRKKDKPHSTGDVTIIDLDLSRYNDIATRFAQEREETLN
MG1655      121 ICWFLLAEARYLPARLIQSSPPRKEOPRGPEVTIIDLDLSRYNAIASRFAEEROOTLD
          ***** * ***** * * ***** ** *** **

14028s      181 FLKSGIATRNPCFNRMIEQIERVAIRSRSPILLNGPTGAGKSFLARRIYELKLARHQFSG
MG1655      181 FLKSGIATRNPHFNRMIEQIEKVAIKSRAPILLNGPTGAGKSFLARRILELKQARHQFSG
          ***** ***** ** ** ***** ***** ** *****

14028s      241 PFVEVNCATLRGDTAMSALFGHVKGAFTGAREERAGLLRSADGGMLFLDEVGELGADEQA
MG1655      241 AFVEVNCATLRGDTAMSTLFGHVKGAFTGARESREGLLRSANGGMLFLDEIGELGADEQA
          ***** ***** * ***** ***** *****

14028s      301 MLLKAIEEKRFYPFGSDQVSSDFOLIAGTVRDLRQRVAEGTFREDLYARINLWTFELPG
MG1655      301 MLLKAIEEKTFYPFGSDROVSSDFOLIAGTVRDLRQLVAEGKFREDLYARINLWTFTLPG
          ***** ***** ***** ***** ***** *****

14028s      361 LRQRQEDIEPNLDYELERHAALTGDSVRFNTEARRAWLSFATSPQAAWRGNFRELSASVT
MG1655      361 LRQRQEDIEPNLDYEVERHASLTGDSVRFNTEARRAWLAFATSPQATWRGNFRELSASVT
          ***** ***** ***** ***** ***** *****

14028s      421 RMATLADNGRITVETVDEIARLRYSWNDHRPSALDGLPGIDATALDLFDRMOLENVVAV
MG1655      421 RMATFATSGRITLDVEDEINRLRYNWOESRPSALTALGAEAENIDLFDRMOLEHVIAI
          ***** * ***** * *** ***** * ***** * * * ***** * *

14028s      481 CROAKTLSDAGROLFNVSROGKATVNDADRLRKYLARFGLTWDVLON-----
MG1655      481 CROAKSLSAAGROLFDVSROGKASVNDADRLRKYLARFGLTWEAVODOHSS
          ***** ** ***** ***** ***** ***** ***** *

```

**Figure S6.** Amino acid sequence alignment of *S. Typhimurium* 14028s and *E. coli* MG1655 RtcR. The two proteins share 83.6% total amino acid identity, with 83.7% identity in the regulatory domain (underlined in orange), 94% identity in the AAA+ ATPase domain (underlined in green), and 77.1% identity in the DNA binding domain (underlined in blue). Amino acid substitutions are highlighted with colors denoting their side chain properties: negatively charged (red), positively charged (turquoise), polar (green), nonpolar (magenta), or aromatic (yellow).

## References for Supplemental Material:

1. **Bono AC, Hartman CE, Solaimanpour S, Tong H, Porwollik S, McClelland M, Frye JG, Mrázek J, Karls AC.** 2017. Novel DNA Binding and Regulatory Activities for  $\sigma^{54}$  (RpoN) in *Salmonella enterica* serovar Typhimurium 14028s. *J Bacteriol* **199**.
2. **Grana D, Youderian P, Susskind MM.** 1985. Mutations that improve the *ant* promoter of *Salmonella* phage P22. *Genetics* **110**:1-16.
3. **Baba T, Ara T, Hasegawa M, Takai Y, Okumura Y, Baba M, Datsenko KA, Tomita M, Wanner BL, Mori H.** 2006. Construction of *Escherichia coli* K-12 in-frame, single-gene knockout mutants: the Keio collection. *Mol Syst Biol* **2**:2006 0008.
4. **Datsenko KA, Wanner BL.** 2000. One-step inactivation of chromosomal genes in *Escherichia coli* K-12 using PCR products. *Proc Natl Acad Sci U S A* **97**:6640-6645.
5. **Cherepanov PP, Wackernagel W.** 1995. Gene disruption in *Escherichia coli*: TcR and KmR cassettes with the option of Flp-catalyzed excision of the antibiotic-resistance determinant. *Gene* **158**:9-14.
6. **Benoit SL, Maier RJ.** 2011. Mua (HP0868) is a nickel-binding protein that modulates urease activity in *Helicobacter pylori*. *MBio* **2**:e00039-00011.
7. **Hughes KT, Youderian P, Simon MI.** 1988. Phase variation in *Salmonella*: analysis of Hin recombinase and *hix* recombination site interaction *in vivo*. *Genes Dev* **2**:937-948.
8. **Khan SR, Gaines J, Roop RM, 2nd, Farrand SK.** 2008. Broad-host-range expression vectors with tightly regulated promoters and their use to examine the influence of TraR and TraM expression on Ti plasmid quorum sensing. *Appl Environ Microbiol* **74**:5053-5062.
9. **Guzman LM, Belin D, Carson MJ, Beckwith J.** 1995. Tight regulation, modulation, and high-level expression by vectors containing the arabinose PBAD promoter. *J Bacteriol* **177**:4121-4130.
10. **Brown DR, Barton G, Pan Z, Buck M, Wigneshweraraj S.** 2014. Nitrogen stress response and stringent response are coupled in *Escherichia coli*. *Nat Commun* **5**:4115.
